# Supplementary material for: IgA Nephropathy Is the Most Common Underlying Disease in Patients With Anticoagulant-Related Nephropathy
Source: PubMed Central journal article supplement (PMC9039479; doi:10.1016/j.ekir.2022.01.1048), 2022-01-19
Supplement: mmc1.pdf [file mmc1.pdf]

*IgA nephropathy is the most common underlying disease in patients with anticoagulant-related nephropathy*

**Index to Supplemental Material**

---

1. Supplemental Table S1 .....2

**Supplemental Table S1.** Clinical and histologic characteristics and outcomes of patients with ARN and IgAN available in the literature.

| Author (year)      | Number of patients | Age (years) | Sex           | Anticoagulant                                         | Presentation                         | INR       | Baseline SCr (mg/dl) | Peak SCr (mg/dl)    | Underlying kidney disease                                                                    | Histopathologic findings                                                           | Management                 | Outcome                                                            |
|--------------------|--------------------|-------------|---------------|-------------------------------------------------------|--------------------------------------|-----------|----------------------|---------------------|----------------------------------------------------------------------------------------------|------------------------------------------------------------------------------------|----------------------------|--------------------------------------------------------------------|
| August (2002)      | 1                  | 59          | F             | Phenprocoumon                                         | Gross hematuria, edema, dyspnea      | 3.6       | 1                    | 8.4                 | IgAN                                                                                         | Mesangial expansion, RBC                                                           | HD, steroids               | Recovery                                                           |
| Brodsky (2009)     | 9                  | 61+/-19     | M: 5<br>F: 4  | Warfarin                                              | Hematuria (n=9)                      | 4.3+/-1.9 | 1.3+/-0.8            | 4.2+/-2.3           | IgAN (n=2), IgAN/DN (n=1), SLE (n=1), ICGN (IgG) (n=1), FSGS (n=1), NS (n=2)                 | Mesangial expansion (n=2) RBC (n=4), ATN (n=9), IgA mesangial deposits in IF (n=5) | N/A                        | Recovery (n=4), HD (n=3), death (n=1), CKD (n=1)                   |
| Cleary (2010)      | 1                  | 51          | F             | Acenocoumarol                                         | Gross hematuria, proteinuria, AKI    | 6.2       | 0.8                  | 8.6                 | IgAN                                                                                         | Mesangial expansion, RBC, crescent and necrotizing lesions                         | Steroids, cyclophosphamide | Recovery                                                           |
| Woo (2012)         | 1                  | 48          | M             | Warfarin                                              | Hematuria, proteinuria               | >3        | N/A                  | 2                   | IgAN                                                                                         | Mild mesangial IgA deposits, RBC                                                   | N/A                        | N/A                                                                |
| Moeckel (2013)     | 1                  | 67          | M             | Dabigatran                                            | Gross hematuria                      | 1.6       | 1                    | 5.5                 | IgAN                                                                                         | Moderate mesangial IgA deposits, RBC                                               | Fluid therapy              | CKD                                                                |
| Escoli (2015)      | 1                  | 69          | F             | Dabigatran                                            | Hematuria, AKI                       | 2.3       | 1.5                  | 8                   | IgAN                                                                                         | Moderate mesangial IgA deposits, RBC, ATN                                          | Fluid therapy, HD          | CKD                                                                |
| Ng (2016)          | 1                  | 56          | F             | Warfarin                                              | Hematuria, AKI                       | 5         | 0.8                  | 3.5                 | IgAN                                                                                         | FSGS, RBC, ATN                                                                     | Steroids                   | CKD                                                                |
| Góis (2017)        | 1                  | 84          | M             | Acenocoumarol                                         | Gross hematuria, AKI                 | 2         | 1                    | 4.6                 | IgAN                                                                                         | Mild mesangial hypercellularity, moderate IgA deposits, RBC, ATN                   | Anticoagulant stopped      | CKD                                                                |
| Kalaitzidis (2017) | 1                  | 78          | F             | Dabigatran                                            | Hematuria, AKI                       | 1.9       | 1.1                  | 6.8                 | IgAN                                                                                         | Moderate mesangial IgA deposits, RBC, ATN                                          | Anticoagulant stopped      | Recovery                                                           |
| Golbin (2017)      | 13                 | 69+/-13     | M: 10<br>F: 3 | Fluindione (n=7), acenocoumarol (n=2), warfarin (n=4) | Gross hematuria (n=13)               | 5.7+/-3   | 5.5 HD (n=6)         | eGFR 77+/-25 ml/min | IgAN (n=5), IgAN + DN (n=1), HSP (n=1), PIGN (n=1), ICGN (IgG k) (n=1), HTNS (n=3), NI (n=1) | RBC (n=11), ATN (n=12), fibrosis (n=9), IgA mesangial deposits in IF (n=6)         | Anticoagulant stopped      | Recovery (n=1), CKD (n=9), HD dependent at 1 yr (n=1), death (n=2) |
| Brodsky (2017)     | 1                  | 82          | F             | Apixaban                                              | Oliguria, microscopic hematuria, AKI | N/A       | 3.2                  | 8.5                 | Focal and segmental necrotizing and crescentic GN (active)                                   | Small cellular crescent, AKI, RBC, IgA mesangial deposits in IF                    | Steroids                   | HD dependent                                                       |

|                |    |         |                |                                                                                                   |                                   |         |           |           |                                                                                         |                                                                                                |                       |              |
|----------------|----|---------|----------------|---------------------------------------------------------------------------------------------------|-----------------------------------|---------|-----------|-----------|-----------------------------------------------------------------------------------------|------------------------------------------------------------------------------------------------|-----------------------|--------------|
| Ishii (2018)   | 1  | 55      | M              | Warfarin                                                                                          | Hematuria, proteinuria, AKI       | 3.7     | 0.7       | 9         | IgAN                                                                                    | Mild mesangial hypercellularity, moderate IgA deposits, RBC, crescentic lesions                | Fluid therapy         | CKD          |
| Brodsky (2019) | 41 | 62+/-14 | M: 26<br>F: 15 | Warfarin (n=28), heparin (n=4), apixaban (n=2), clopidogrel and aspirin (n=1), coagulopathy (n=6) | Hematuria (n=41)                  | 5.6+/-6 | 1.2+/-0.4 | 4.3+/-1.9 | IgAN (n=14), ICGN (IgG) (n=5), SLE (n=3), PIGN (n=8), FSGS (n=4), DN (n=2), other (n=5) | Mild immune complex deposition (n=22), RBC (n=22), focal-mild interstitial inflammation (n=22) | N/A                   | N/A          |
| Li X (2019)    | 1  | 61      | M              | Dabigatran                                                                                        | Gross hematuria, AKI              | 4       | 0.9       | 10.1      | IgAN                                                                                    | Mesangial expansion, RBC, ATN, crescent and necrotizing lesions, moderate IgA deposits         | HD, steroids          | Recovery     |
| Li J (2019)    | 1  | 70      | M              | Warfarin                                                                                          | Hematuria, proteinuria, AKI       | 8.7     | 1.3       | 4.4       | IgAN                                                                                    | Mesangial expansion, RBC, moderate IgA deposits                                                | Fluid therapy, HD     | CKD          |
| Rawala (2019)  | 1  | 61      | M              | Warfarin                                                                                          | Gross hematuria, AKI              | 3.5     | 2.0       | 6.8       | IgAN                                                                                    | Mild mesangial hypercellularity, mild IgA deposits, RBC                                        | Steroids, HD          | HD dependent |
| Ikeda (2019)   | 1  | 67      | F              | Dabigatran                                                                                        | Gross hematuria, proteinuria, AKI | 2.4     | 0.5       | 3.6       | IgAN                                                                                    | Moderate IgA deposits, RBC, ATN                                                                | Anticoagulant stopped | Recovery     |

**Abbreviations:** AKI: acute kidney injury; ARN: anticoagulant-related nephropathy; ATN: acute tubular necrosis; CKD: chronic kidney disease; DN: diabetic nephropathy; eGFR: estimated glomerular filtration rate; F: female; FSGS: focal segmental glomerulosclerosis; HD: hemodialysis; HSP: Henoch-Schönlein purpura; HTNS: hypertensive nodular sclerosis; ICGN: immune-complex glomerulonephritis; IF: immunofluorescence; IgAN: IgA nephropathy; N/A: not available; INR: International Normalized Ratio; M: male; NI: not identified; NS: nodular sclerosis; PIGN: pauci-immune glomerulonephritis; RBC: red blood cell casts; SCr: serum creatinine; SLE: systemic lupus erythematosus;
